# Supplementary material for: Live cell interactome of the human voltage dependent anion channel 3 (VDAC3) revealed in HeLa cells by affinity purification tag technique
Source: Royal Society of Chemistry journal article supplement (doi:10.1039/c4mb00237g), 2014-05-14
Supplement: c4mb00237g1.xlsx [file c4mb00237g1.xlsx]

## Sheet: Foglio1
TABLE 1. List of proteins interacting in vivo with tagged hVDAC3 identified by MS-SPEC.
spot n°	est. MW	poss. pI	Protein Name	score	cover %	UniProt ID	Localization	Symbol
1	150	6.3	Carbamoylphosphate synthetase I	1817	37	Q5R210	mito	CPS1
2	110	5.16	Oxygen-regulated protein precursor	708	23	Q9Y4L1	ER	ORP150
3	95	5.18	Heat shock 70 kDa protein 4	1251	45	P34932	mito, cyto	HSP74
3	95	5.28	Hsp70 4 isoform variant	979	29	Q59GF8	mito, cyto	HSP74.1
4	90	4.73	Endoplasmin	1321	41	P14625	ER	HSP90B1
5	90	5.14	TER-ATPase	1688	52	P55072	ER, cyto	VCP
6.7	80	4.97	Hsp 90 1 beta	968	34	P08238	cyto	HSP90AB1
6.7	82	4.97	Hsp 90 alfa	784	27	P07900	cyto	HSP86
8.9	70	5.07	Hsp70 GRP	1590	51	P11021	ER, cyto	HSPA5
9.1	70	5.37	Heat shock cognate 71 kDa protein	1163	36	P11142	cyto	HSPA8
10	70	5.87	Stress-70 protein	1073	42	P38646	mito, nucl	GRP75
10	70	5.48	Heat shock 70 kDa protein 1A/1B	671	27	P08107	cyto, ER, mito	HSPA1A
11	62	6.32	Phosphoglucomutase 1	631	35	P36871	cyto, ctk	PGM1
11.12	62	6.4	Prelamin A/C	1396	54	P02545	cyto, nc	LMNA
12	62	6.27	purine biosynthesis protein (purH)	521	36	P31939	cyto, mito	PURH
13	59	5.7	60 kDa heat shock protein	2113	64	P10809	mito	HSPD1
13	59	5.45	Belongs to TCP1 chaperone family	481	30	Q9BU08	cyto
14	55	4.76	Protein disulfide-isomerase	700	37	P07237	ER	PDI
15	52	5.06	Vimentin	1023	60	P08670	int. filam, cyto	VIM
16	50	5.52	Cytokeratin-8	1102	54	P05787	cyto, int. filam.	CK8
17	49	4.3	Calreticulin	644	32	Q53G71	ER, cyto	CALR
18	48	4.83	Tubulin, beta 2C	1500	68	Q8IZ29	mict	TUBB2C
18	48	4.75	Tubulin beta-5 chain	1522	68	P07437	mict, cyto	TUBB5
18	48	5.26	ATP synthase subunit beta	1384	61	Q9B1D3	mito	ATPMB
18	48	4.94	Tubulin alpha-1 beta	1180	54	P68363	mict, cyto	TUBA1B
18	48	5.02	Tubulin alpha-1A	1162	56	Q71U36	mict, cyto	TUBA3
19	47	5.72	26S protease regulatory subunit 7	822	42	P35998	cyto, mito, nc	MSS1
19-22	47	6.99	Alpha-enolase	488	38	P06733	cyto	ENO1L1
19	47	6.11	GDP dissociation inhibitor 2	388	32	Q6IAT1	Golgi, cyto	GDI2
20	47	6.27	Elongation factor 1-gamma	586	25	P26641	cyto	EF1G
20	47	6.3	DEAD box protein 48	360	32	P38919	cyto, nc	DDX48
23	45	4.97	Cytokeratin-17	547	40	Q04695	cyto, int. filam.	K17
23	45	4.95	Protein disulfide-isomerase A6	595	29	Q15084	ER	ERp5
23	45	5.18	Hsc70-interacting protein	411	31	P50502	cyto	HIP
23	45	4.7	Tubulin beta	430	25	Q5JP53	mict.	TUBB
23	45	5.39	26S protease regulatory subunit 6A	499	45	P17980	cyto	TBP-1
24,25,28	43	5.34	Cytokeratin 18	437	33	P05783	cyto, CS	CK18
26	42	4.47	Calumenin	318	19	Q6IAW5	ER	CALU
26	42	5.14	Actin, cytoplasmic 1	395	29	P63261	ctk, cyto	ACTG
28	36-43	5.19	ACTA2 protein	500	38	Q13707	ctk	ACTA2
28	36-43	5.18	Serpin B6	403	34	P35237	cyto, CTS	PI-6
28	36-43	5.02	UNR-interacting protein	350	34	Q9Y3F4	nc, cyto	STRAP
27.29	38	4.86	Reticulocalbin 1	389	21	Q15293	ER	RCN1
29-31	34	4.79	37 kDa laminin receptor precursor	352	30	P08865	ribo	37LRP
31	34	4.67	Nucleophosmin	257	26	P06748	cyto, ctk, MTOC	NPM
31	34	4.9	Elongation factor 1-delta	224	26	P29692	cyto, nc	EF1D
32	32	5.71	L-lactate dehydrogenase B chain	959	54	P07195	cyto, mito	LDHB
33.35	30	4.57	Cyclin	559	46	P12004	cyto, nc	PCNA
34	30	5.57	Prohibitin	515	50	Q6FHP5	mito	PHB
35	29	4.75	Gamma-tropomyosin	854	55	P06753	cyto, ctk	hTM5
36	27	4.64	Stratifin	299	30	P31947	cyto, nc	SFN
37	26	4.93	Protein kinase C inhibitor	422	45	P63104	cyto, CVM	KCIP-1
38, 40	26	5.98	Heat shock protein beta-1	418	52	P04792	cyto, ctk, nc	HspB1
38	26	6	Peroxiredoxin-6	406	50	P30041	cyto, CVM	PRDX6
39	25	5.19	Proteasome subunit alpha type-3	287	38	P25788	cyto, nc, protea.	PSMA3
39	25	5.19	Ran-specific GTPase-activating protein	251	23	P43487	cyto, CTS	RanBP1
40	25	6.23	Glutathione S-transferase omega-1	228	32	P78417	cyto	GSTO-1
41	23	4.74	Proteasome subunit alpha type-5	602	51	P28066	cyto	PSMA5
41	23	4.68	14-3-3 protein theta	183	19	P27348	cyto, CVM	YWHAQ
42	18	4.98	Translationally-controlled tumor protein	288	38	P13693	nc, cyto	TCTP
43	18	5.67	Peroxiredoxin -2	351	41	P32119	cyto	PRDX2
43	18	5.79	Adenine phosphoribosyltransferase	160	25	P07741	cyto	APRT
43	18	5.26	Ras-related protein Rab-9A	168	29	P51151	Golgi, ER	RAB9A
43	18	5.22	ATP synthase subunit d, mitochondrial	123	22	O75947	mito	ATP5H
The Table shows data obtained by spot analysis of a triplicate of two-dimensional gels. The spot number refers to the number indicated in Fig. S2. MW and pI columns refer to the molecular ratio and isoelectric point of each protein as determined experimentally in this work. Cover % is the sequence coverage determined by Mascot. Since the pI gradient is limited, very basic proteins have not been d…
