# Supplementary material for: Live cell interactome of the human voltage dependent anion channel 3 (VDAC3) revealed in HeLa cells by affinity purification tag technique
Source: Royal Society of Chemistry journal article supplement (doi:10.1039/c4mb00237g), 2014-05-14
Supplement: c4mb00237g7.pdf [file c4mb00237g7.pdf]

## SUPPLEMENTARY MATERIALS

**Supplementary Material. Figure S1.** Quantitative RT-PCR amplification of YFP-TEV-6His-hVDAC3 and VDAC3. The corresponding cDNAs were obtained from 1A4 HeLa cells. Amplifications were monitored by measuring the increase of dye intensity of the SYBR Green included in the reaction. The copy number of the target genes in the samples was determined with a standard curve method using an amplicon of the same gene.

**Supplementary Material. Figure S2. Time course of 1A4 HeLa cells visualized through YFP fluorescence.** The figure shows the same microscope field at 20 min intervals. Cell fluorescence is due to the presence of YFP-TEV-6His-hVDAC3 in mitochondria.

**Supplementary Material. Figure S3. (A) 2-D SDS-PAGE of proteins interacting with 6xHis-hVDAC3.** First dimension: non linear IEF gradient 3-10. Second dimension: Bis-TrisHCl 4-12% gel (Invitrogen) in the presence of a MOPS buffer. The experiment was run in triplicate. The figure shows an example of separation. **(B) The same picture as in Figure 6, showing the circled spots excised and analyzed by Mass Spectrometry.**
