# Supplementary figures and images for: Live cell interactome of the human voltage dependent anion channel 3 (VDAC3) revealed in HeLa cells by affinity purification tag technique
Source: Royal Society of Chemistry journal article supplement (doi:10.1039/c4mb00237g), 2014-05-14

**Figure S1, Messina et al**

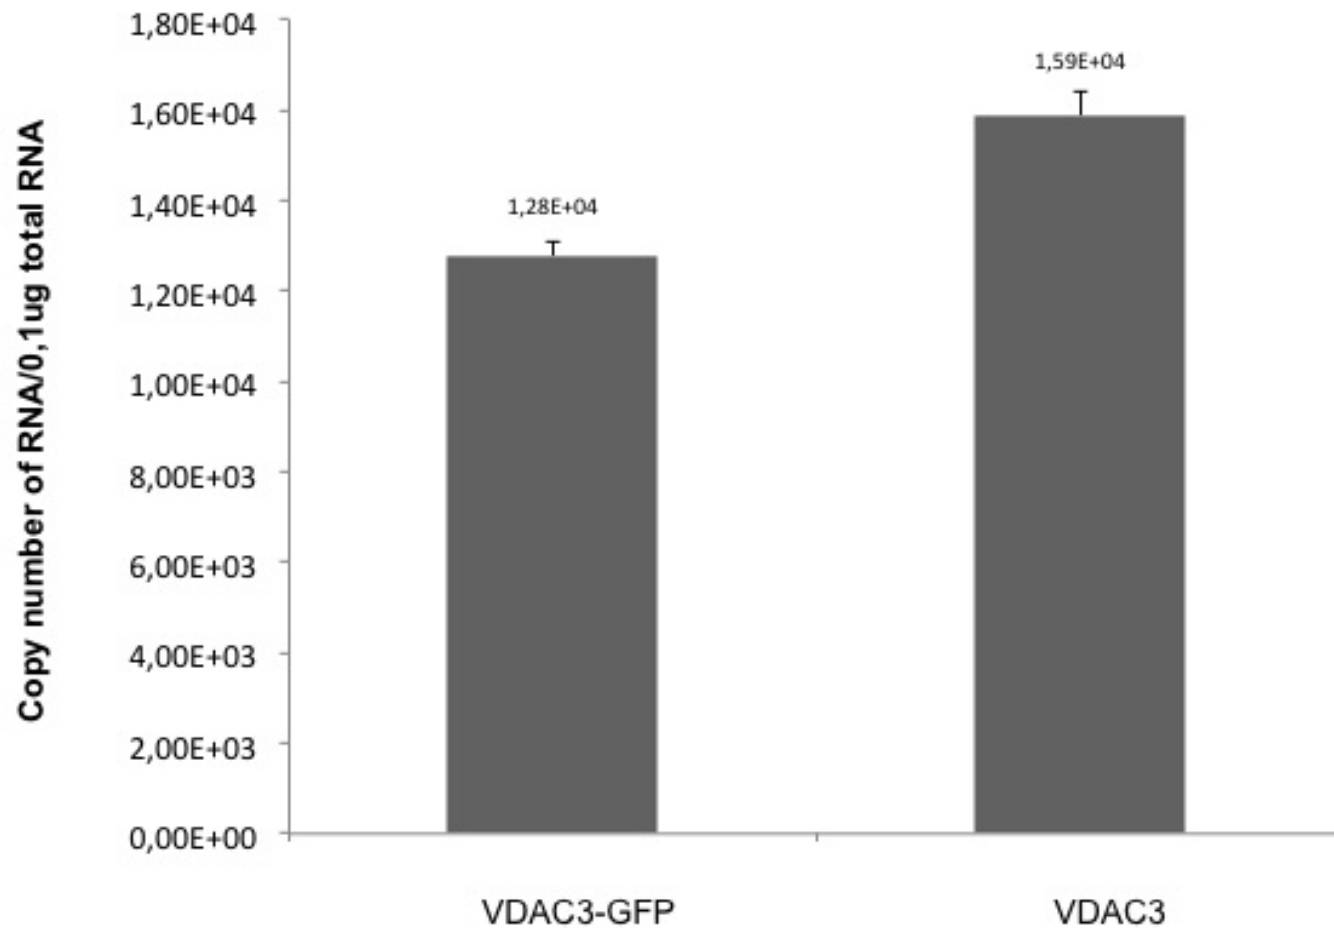

Supplement: c4mb00237g2.pdf [file c4mb00237g2.pdf]

**Figure S3B, Messina et al**

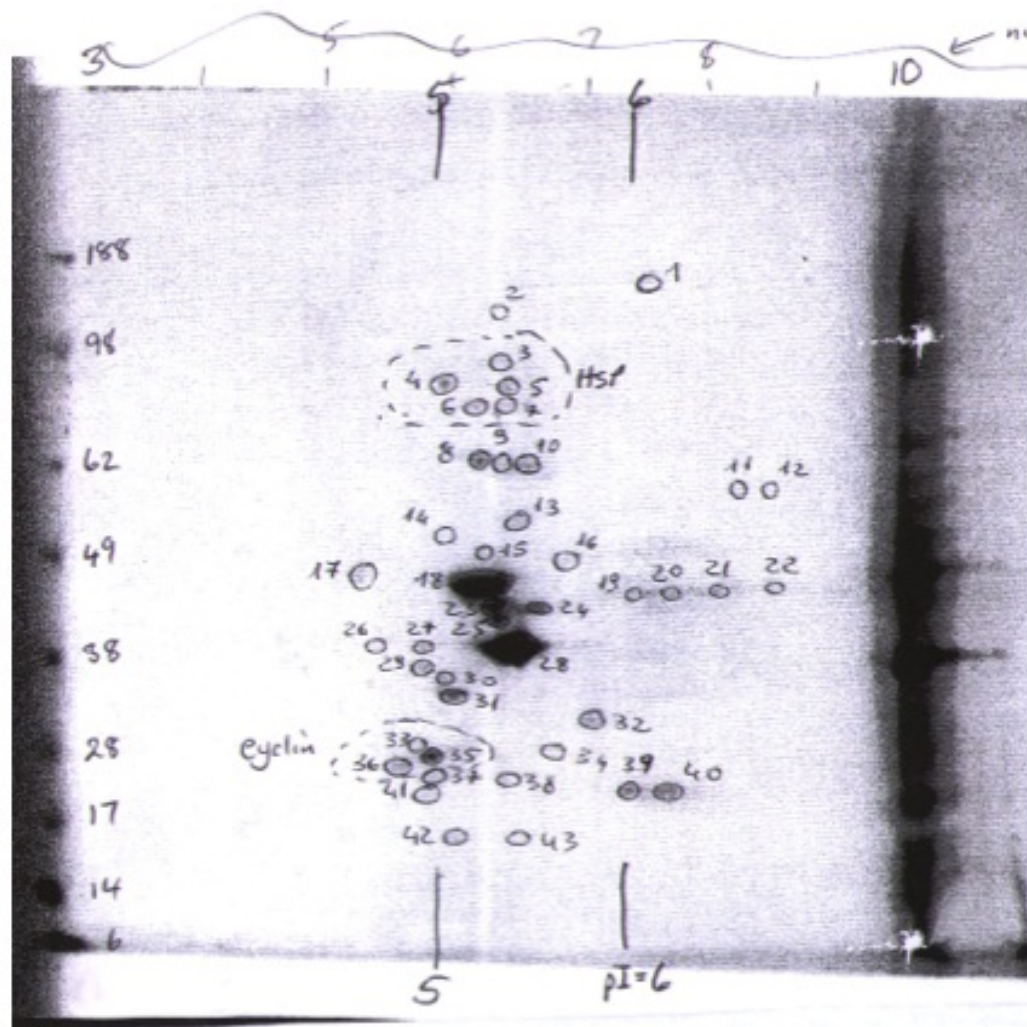

Supplement: c4mb00237g5.pdf [file c4mb00237g5.pdf]

**Figure S3C, Messina et al**

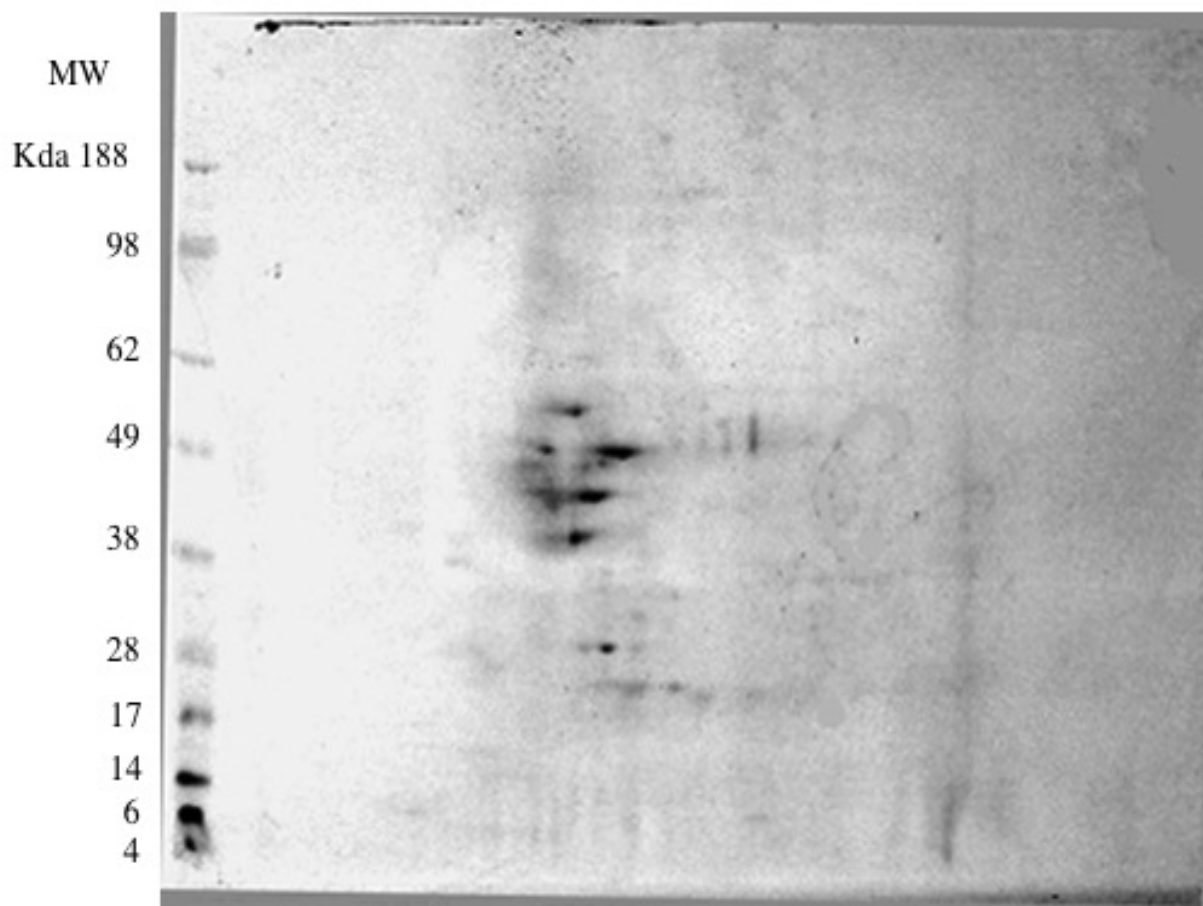

Supplement: c4mb00237g6.pdf [file c4mb00237g6.pdf]
